# Supplementary material for: A facile heterogeneous system for persulfate activation by CuFe2O4 under LED light irradiation
Source: Royal Society of Chemistry journal article supplement (doi:10.1039/c9ra05574f), 2019-01-01
Supplement: c9ra05574f1.pdf [file c9ra05574f1.pdf]

# Supplementary materials

**A facile heterogeneous system for persulfate activation by  $\text{CuFe}_2\text{O}_4$**

**under LED light irradiation**

Xin Zhong, \* Xiao-Yu Ye, Di Wu, Kai-Xin Zhang and Wei Huang

Department of Environmental Science and Engineering, Beijing Normal  
University, Zhuhai, China

\*Corresponding author: Xin Zhong. Tel: +86-0756-6126103

E-mail: [zhongxin@whu.edu.cn](mailto:zhongxin@whu.edu.cn)

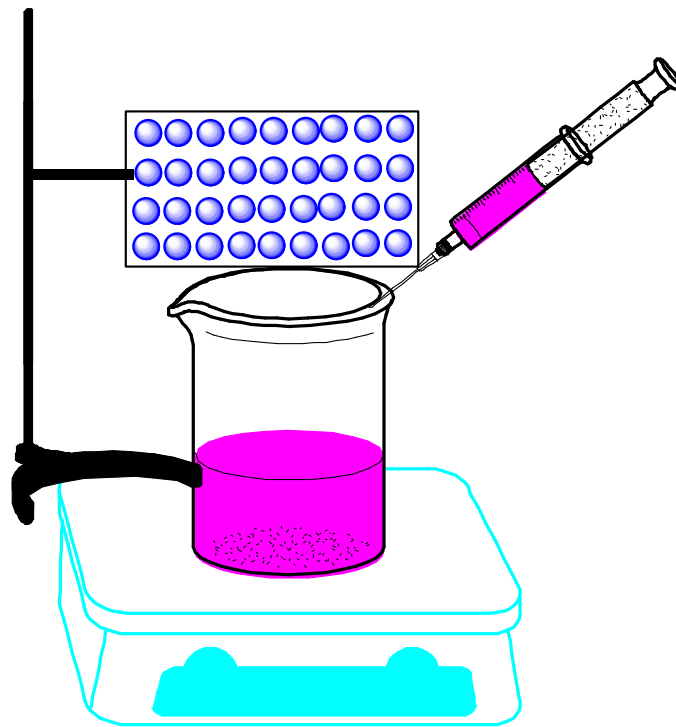

Fig. S1 The experiment set-ups for the experiment

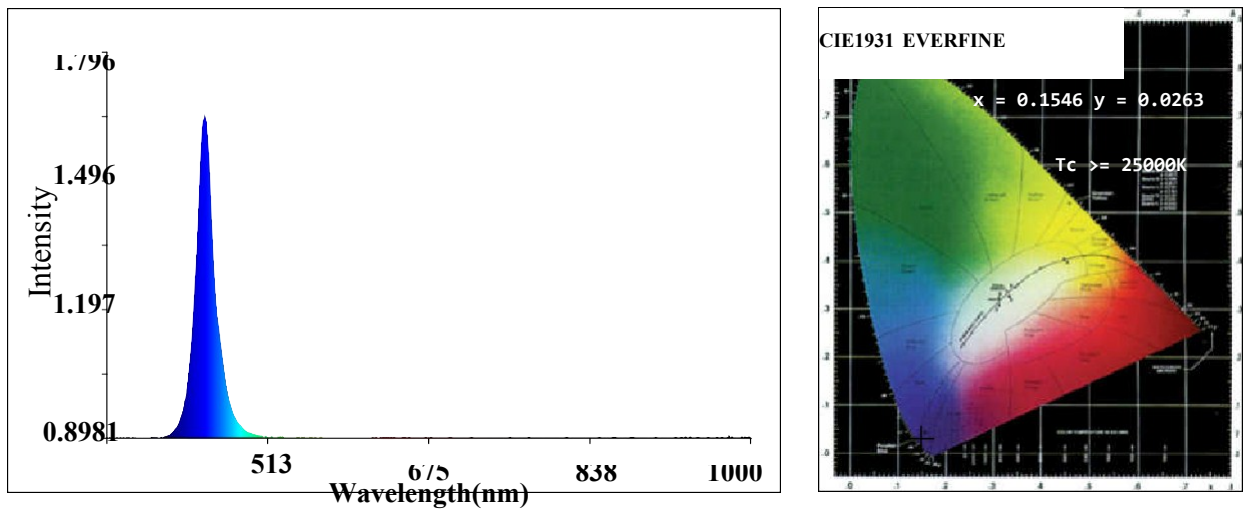

Fig. S2 The photo-luminescence spectra of LED light ( $T_c = 100000K$ ,  $\lambda_d = 454.1nm$ , Purity = 98.6%, R = 1.0%, G = 13.1%, B = 86.0%,  $\Delta\lambda_d = 18.0$  nm)

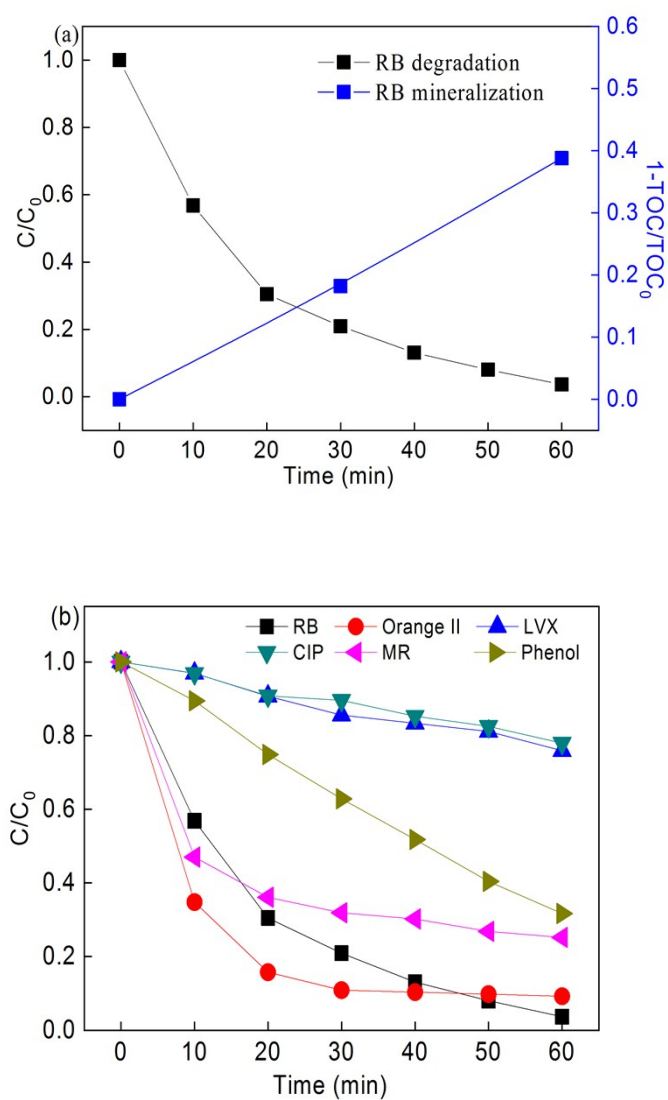

Fig. S3 (a) The degradation and mineralization of RB in  $\text{CuFe}_2\text{O}_4/\text{PS}/\text{LED}$  system, (b) degradation efficiency of various kinds of organic pollutants. Initial conditions:  $[\text{CuFe}_2\text{O}_4] = 0.5 \text{ g L}^{-1}$ ,  $[\text{PS}] = 0.2 \text{ mM}$ ,  $[\text{organic pollutants}]_0 = 20 \text{ mg L}^{-1}$ , neutral pH.

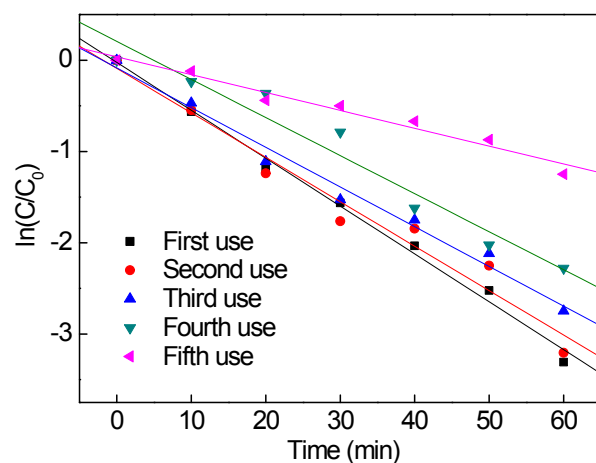

Fig. S4 Reusability of  $\text{CuFe}_2\text{O}_4$  for RB removal kinetic curves. Initial conditions:  $[\text{CuFe}_2\text{O}_4] = 0.5 \text{ g L}^{-1}$ ,  $[\text{PS}] = 0.2 \text{ mM}$ ,  $C_0 = 20 \text{ mg L}^{-1}$ , neutral pH.

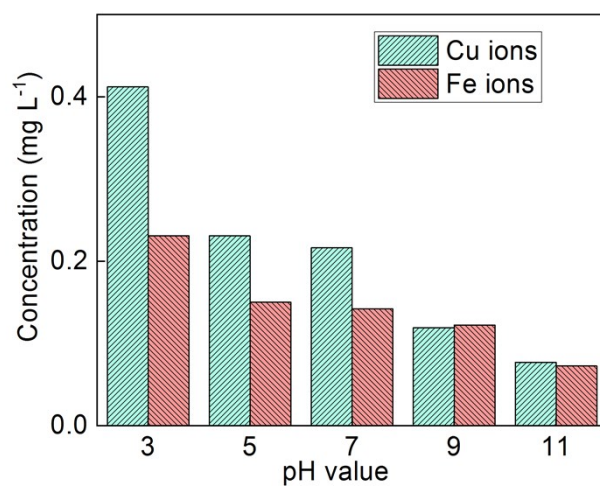

Fig. S5 The iron and copper leaching concentrations under different pH value. Initial conditions:  $[\text{CuFe}_2\text{O}_4] = 0.5 \text{ g L}^{-1}$ ,  $[\text{PS}] = 0.2 \text{ mM}$ ,  $C_0 = 20 \text{ mg L}^{-1}$ .

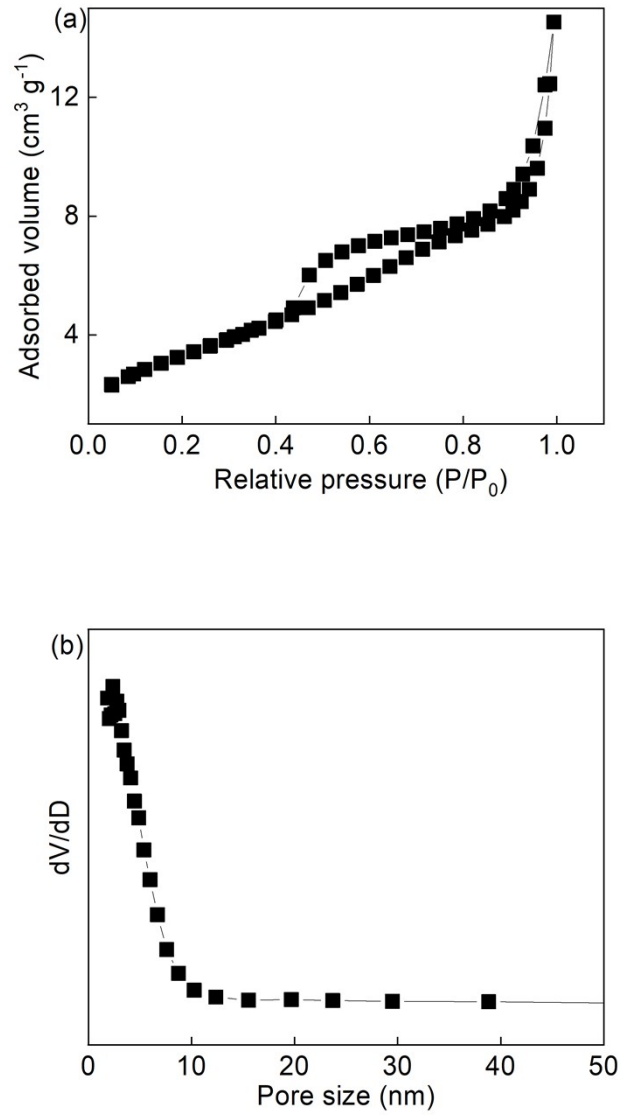

Fig. S6 (a) The  $\text{N}_2$  adsorption-desorption isotherms of prepared  $\text{CuFe}_2\text{O}_4$ ,  
(b) pore size distribution.

Table S1 Main reaction intermediates for the degradation of RB in the CuFe<sub>2</sub>O<sub>4</sub>/PS/LED identified by GC/MS analysis.

| No. | Identified intermediates  | Structure                                                                            | m/z |
|-----|---------------------------|--------------------------------------------------------------------------------------|-----|
| 0   | Rhodamine B               | 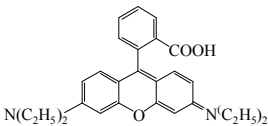   | 443 |
| 1   | 3-(diethylamino) phenol   |    | 165 |
| 2   | Phthalic acid             |    | 166 |
| 3   | Isobenzofuran-1,3-dione   |    | 148 |
| 4   | Methyl hydrogen phthalate |  | 222 |
| 5   | Hydroquinone              |  | 110 |
| 6   | Benzoic acid              |  | 122 |
| 7   | o-xylene                  |  | 106 |
